# Supplementary material for: Development and feasibility of an intervention featuring individual supported work placements to aid return to work for unemployed people living with chronic pain
Source: PubMed Central journal article supplement (PMC7175501; doi:10.1186/s40814-020-00581-6), 2020-04-22
Supplement: 40814_2020_581_MOESM1_ESM.pdf [file 40814_2020_581_MOESM1_ESM.pdf]

**Additional File 1 – Available and matched placement details**

| <b>No.</b> | <b>Placement Title</b>           | <b>Provider</b>          | <b>Details/duties/notes</b>                                | <b>Location</b>      | <b>Filled by</b> |
|------------|----------------------------------|--------------------------|------------------------------------------------------------|----------------------|------------------|
| 1.         | Tender assistant                 | University of Warwick    | Assist procurement team with administrative tasks          | Coventry             | PP02             |
| 2.         | Retail and Information Assistant | Council                  | Working in retail and information centre in a country park | Coventry (outskirts) | PP08             |
| 3.         | Events and Activities Placement  | Council                  | Part of an events and activities team in a country park    | Coventry (outskirts) | PP14             |
| 4.         | Events and Activities Placement  | Council                  | Part of an events and activities team in a country park    | Coventry (outskirts) | PP21             |
| 5.         | Administrative Assistant         | Council                  | Council logistics and data entry                           | Coventry             | PP11             |
| 6.         | Assistant Trainer                | Council                  | IT support                                                 | Coventry             | PP18             |
| 7.         | Administrative Assistant         | Council                  | Meet and greet, data entry, record keeping, and phones     | Coventry             | PP09             |
| 8          | Administrative Assistant         | Council                  | Meet and greet, data entry, record keeping, and phones     | Coventry             | PP26             |
| 9          | Patient Advice Liaison Service   | NHS Trust                | Administrative assistance                                  | Birmingham           | PP04             |
| 10         | Estate maintenance operative     | Council                  | Maintenance within a cemetery and garden of remembrance    | Coventry             | PP19             |
| 11         | Estate maintenance operative     | Council                  | Maintenance within a cemetery and garden of remembrance    | Coventry             | PP24             |
| 12         | Cleaner                          | Public Services Provider | Cleaner within a leisure centre                            | Birmingham           | PP22             |
| 13         | Radiography helper               | NHS Trust                | Meeting patients and assisting in X-ray departments        | Birmingham           | PP23             |

|    |                              |           |                                                                                          |            |        |
|----|------------------------------|-----------|------------------------------------------------------------------------------------------|------------|--------|
| 14 | Radiography helper           | NHS Trust | Meeting patients and assisting in X-ray departments                                      | Birmingham | PP30   |
| 15 | IT Assistant                 | NHS Trust | IT/ Audit assistant within IT department                                                 | Birmingham | PP20   |
| 16 | Estate Assistant (withdrawn) | Council   | Estate assistant within a country park. Eventually withdrawn due to staffing issues      | Coventry   | Unused |
| 17 | Administrative Assistant     | NHS Trust | Administrative assistant within a breast screening unit                                  | Birmingham | Unused |
| 18 | Administrative Assistant     | NHS Trust | Administrative assistant within a booking unit                                           | Birmingham | Unused |
| 19 | Front of House Receptionist  | NHS Trust | Administrative assistance at Front of House reception                                    | Birmingham | Unused |
| 20 | Nursing Assistant            | NHS Trust | Nursing Assistant in neurology                                                           | Birmingham | Unused |
| 21 | Nursing Assistant            | NHS Trust | Nursing Assistant in geriatric medicine                                                  | Birmingham | Unused |
| 22 | Nursing Assistant            | NHS Trust | Nursing Assistant in oncology                                                            | Birmingham | Unused |
| 23 | Nursing Assistant            | NHS Trust | Nursing Assistant in burns                                                               | Birmingham | Unused |
| 24 | Nursing Assistant            | NHS Trust | Nursing Assistant in Accident and Emergency                                              | Birmingham | Unused |
| 25 | Theatre Support Worker       | NHS Trust | Porting services                                                                         | Birmingham | Unused |
| 26 | Transport Assistant          | NHS Trust | Delivering goods and specimens                                                           | Birmingham | Unused |
| 27 | Physiotherapy Assistant      | NHS Trust | A supportive role unless participant had relevant previous experience and qualifications | Birmingham | Unused |
| 28 | Housekeeper                  | NHS Trust | Assisting with cleaning wards and hospital corridors                                     | Birmingham | Unused |

|    |                         |                          |                                                                                                                                |              |        |
|----|-------------------------|--------------------------|--------------------------------------------------------------------------------------------------------------------------------|--------------|--------|
| 29 | Porter                  | NHS Trust                | Porting services                                                                                                               | Birmingham   | Unused |
| 30 | Logistics               | NHS Trust                | Assisting (physically) with receipt and movement of goods                                                                      | Birmingham   | Unused |
| 31 | Stores operative        | NHS Trust                | Storekeeping and movement of goods                                                                                             | Birmingham   | Unused |
| 32 | Catering Assistant      | NHS Trust                | Assisting with preparation of food                                                                                             | Birmingham   | Unused |
| 33 | Medical engineering     | NHS Trust                | A supportive role unless participant had relevant previous experience and qualifications                                       | Birmingham   | Unused |
| 34 | Phlebotomy assistant    | NHS Trust                | A supportive role unless participant had relevant previous experience and qualifications                                       | Birmingham   | Unused |
| 35 | Administrator           | Public Services Provider | Administrative tasks within environmental services                                                                             | Oldbury      | Unused |
| 36 | HR Support Co-ordinator | Public Services Provider | Administrative tasks                                                                                                           | Bournville   | Unused |
| 37 | Service Desk Analyst    | Public Services Provider | IT support and incident management                                                                                             | Bournville   | Unused |
| 38 | Catering Assistant      | Public Services Provider | Food preparation and serving assistant                                                                                         | King's Heath | Unused |
| 39 | Receptionist            | Public Services Provider | Administrative tasks                                                                                                           | Perry Barr   | Unused |
| 40 | Recreation Assistant    | Public Services Provider | Setting up equipment, cleaning, and vending machine filling                                                                    | Acocks Green | Unused |
| 41 | Catering Assistant      | Public Services Provider | Food preparation and serving assistant                                                                                         | Stechford    | Unused |
| 42 | Recreation Assistant    | Public Services Provider | Supporting the operation of the site, includes setting up sports equipment, basic cleaning tasks, and filling vending machines | Stechford    | Unused |

|    |                                                                                                            |                             |                                                                                                |            |        |
|----|------------------------------------------------------------------------------------------------------------|-----------------------------|------------------------------------------------------------------------------------------------|------------|--------|
| 43 | Canteen Assistant<br>(withdrawn but<br>offer to replace<br>with additional<br>HR/IT roles as per<br>36/37) | Public Services<br>Provider | Preparing sandwiches,<br>serving customers,<br>writing sandwich labels,<br>re-stocking fridge. | Bournville | Unused |
|----|------------------------------------------------------------------------------------------------------------|-----------------------------|------------------------------------------------------------------------------------------------|------------|--------|
